# Supplementary material
Source: PubMed Central journal article supplement (PMC7537672)
Supplement: NIHMS1631723-supplement-Suppl_Appendix_2.pdf [file NIHMS1631723-supplement-Suppl_Appendix_2.pdf]

Appendix 2. Subject recruitment poster displayed at the reception desk.



**FROM SEPTEMBER 19TH- NOVEMBER 12TH,  
COMPLETE OUR QUESTIONNAIRE AND RECEIVE A  
\$10 AMAZON GIFT CARD.  
SOME PARTICIPANTS WILL QUALIFY FOR A CHANCE  
TO WIN AN ADDITIONAL \$40.**

**ARE YOU  
11-18 YEARS  
OLD?**

**DO YOU  
CURRENTLY  
PLAY ON A  
SCHOOL  
FOOTBALL  
TEAM?**

**ARE YOU  
CURRENTLY  
WEARING  
BRACES OR  
CLEAR  
ALIGNERS?**

**IF YES,  
EARN \$10  
IN 5  
MINUTES!**

**TAKE THIS QUESTIONNAIRE ON YOUR  
COMPUTER OR SMART PHONE. ASK THE FRONT  
DESK FOR THE WEBSITE AND ENTRY CODE.**

**W** This study is being conducted by the University of Washington Department of Orthodontics



**FROM NOVEMBER 15TH- FEBRUARY 28TH,  
COMPLETE OUR QUESTIONNAIRE AND RECEIVE A  
\$10 AMAZON GIFT CARD.  
SOME PARTICIPANTS WILL QUALIFY FOR A CHANCE  
TO WIN AN ADDITIONAL \$40.**

**ARE YOU  
11-18 YEARS  
OLD?**

**DO YOU  
CURRENTLY  
PLAY ON A  
SCHOOL  
BASKETBALL  
TEAM?**

**ARE YOU  
CURRENTLY  
WEARING  
BRACES OR  
CLEAR  
ALIGNERS?**

**IF YES,  
EARN \$10  
IN 5  
MINUTES!**

**TAKE THIS QUESTIONNAIRE ON YOUR  
COMPUTER OR SMART PHONE. ASK THE FRONT  
DESK FOR THE WEBSITE AND ENTRY CODE.**

**W** This study is being conducted by the University of Washington Department of Orthodontics
