# Supplementary material
Source: PubMed Central journal article supplement (PMC7537672)
Supplement: NIHMS1631723-supplement-Suppl_Appendix_3.pdf [file NIHMS1631723-supplement-Suppl_Appendix_3.pdf]

Appendix 3. Individual subject participation instruction card.

## FROM SEPTEMBER 19 - NOVEMBER 12

 COMPLETE OUR QUESTIONNAIRE AND  
RECEIVE A \$10 AMAZON GIFT CARD.  
SOME PARTICIPANTS WILL QUALIFY FOR  
A CHANCE TO WIN AN ADDITIONAL \$40. 

|                                |                                                                 |                                                                    |                                          |
|--------------------------------|-----------------------------------------------------------------|--------------------------------------------------------------------|------------------------------------------|
| ARE YOU<br>11-18 YEARS<br>OLD? | DO YOU<br>CURRENTLY<br>PLAY ON A<br>SCHOOL<br>FOOTBALL<br>TEAM? | ARE YOU<br>CURRENTLY<br>WEARING<br>BRACES OR<br>CLEAR<br>ALIGNERS? | IF YES,<br>EARN \$10<br>IN 5<br>MINUTES! |
|--------------------------------|-----------------------------------------------------------------|--------------------------------------------------------------------|------------------------------------------|

Go to [www.redcap.com/athletesurvey](http://www.redcap.com/athletesurvey) and enter  
CODE: **UNIQUE ACCESS CODE** to see if you are eligible.  
At the end of the questionnaire, enter your email address  
to receive your Amazon gift card.

 This study is being conducted by the University of Washington Department of Orthodontics

## FROM NOVEMBER 15 - FEBRUARY 28

 COMPLETE OUR QUESTIONNAIRE AND  
RECEIVE A \$10 AMAZON GIFT CARD.  
SOME PARTICIPANTS WILL QUALIFY FOR  
A CHANCE TO WIN AN ADDITIONAL \$40. 

|                                |                                                                   |                                                                    |                                          |
|--------------------------------|-------------------------------------------------------------------|--------------------------------------------------------------------|------------------------------------------|
| ARE YOU<br>11-18 YEARS<br>OLD? | DO YOU<br>CURRENTLY<br>PLAY ON A<br>SCHOOL<br>BASKETBALL<br>TEAM? | ARE YOU<br>CURRENTLY<br>WEARING<br>BRACES OR<br>CLEAR<br>ALIGNERS? | IF YES,<br>EARN \$10<br>IN 5<br>MINUTES! |
|--------------------------------|-------------------------------------------------------------------|--------------------------------------------------------------------|------------------------------------------|

Go to [www.redcap.com/athletesurvey](http://www.redcap.com/athletesurvey) and enter  
CODE: **UNIQUE ACCESS CODE** to see if you are eligible.  
At the end of the questionnaire, enter your email address  
to receive your Amazon gift card.

See reverse side for more details.

 This study is being conducted by the University of Washington Department of Orthodontics
